# Supplementary material
Source: PubMed Central journal article supplement (PMC2860383)
Supplement: NIHMS189930-supplement-2.pdf [file NIHMS189930-supplement-2.pdf]

## Supplement Material

Supplemental Table I. Race- and gender-specific weighted means (SE), proportions of risk factors and plasma levels of MMPs and TIMP-1 in ARIC Carotid MRI Study participants, adjusted by age\*

| Characteristics | White Women<br>(N=632) | White Men<br>(N=672) | African American<br>Women<br>(N=220) | African American<br>Men<br>(N=154) | P-value† by race |         |         | P-value† by gender |          |         |
|-----------------|------------------------|----------------------|--------------------------------------|------------------------------------|------------------|---------|---------|--------------------|----------|---------|
|                 |                        |                      |                                      |                                    | Women            | Men     | Overall | Whites             | Afr. Am. | Overall |
| MMP-1 (ng/ml)   | 0.20 (0.01)            | 0.18 (0.01)          | 0.15 (0.03)                          | 0.12 (0.03)                        | 0.1224           | 0.1298  | 0.0973  | 0.1569             | 0.5264   | 0.2968  |
| MMP-2 (ng/ml)   | 292.3 (5.7)            | 309.2 (6.2)          | 286.8 (9.1)                          | 344.5 (12.3)                       | 0.6042           | 0.0097  | 0.0309  | 0.0445             | 0.0001   | 0.0001  |
| MMP-3 (ng/ml)   | 5.01 (0.14)            | 8.27 (0.23)          | 5.54 (0.37)                          | 7.44 (0.36)                        | 0.1808           | 0.0494  | 0.0604  | <0.0001            | 0.0002   | <0.0001 |
| MMP-7 (ng/ml)   | 2.51 (0.08)            | 2.31 (0.07)          | 3.27 (0.19)                          | 2.74 (0.16)                        | 0.0002           | 0.0144  | <0.0001 | 0.0519             | 0.0310   | 0.0148  |
| MMP-8 (ng/ml)   | 0.44 (0.05)            | 0.43 (0.01)          | 0.52 (0.02)                          | 0.54 (0.03)                        | 0.1097           | 0.0006  | 0.0011  | 0.9515             | 0.5072   | 0.8009  |
| MMP-9 (ng/ml)   | 18.9 (0.3)             | 17.9 (0.6)           | 31.4 (1.2)                           | 33.8 (2.0)                         | <0.0001          | <0.0001 | <0.0001 | 0.1530             | 0.2962   | 0.2074  |
| TIMP-1 (ng/ml)  | 109.3 (1.4)            | 114.7 (1.6)          | 113.7 (2.4)                          | 112.2 (2.7)                        | 0.1085           | 0.4267  | 0.2013  | 0.0096             | 0.6788   | 0.0319  |
| Current smoker  | 7.5 %                  | 6.8 %                | 7.2 %                                | 12.6 %                             | 0.3904           | 0.0066  | 0.0180  | <0.0001            | 0.0070   | <0.0001 |
| Former smoker   | 33.4 %                 | 58.9 %               | 27.6 %                               | 42.3 %                             | ‡                | ‡       | ‡       | ‡                  | ‡        | ‡       |
| Hypertensive    | 62.0 %                 | 56.5 %               | 80.8 %                               | 69.3 %                             | <0.0001          | 0.0203  | <0.0001 | 0.1108             | 0.0353   | 0.0305  |

| Characteristics                     | White Women<br>(N=632) | White Men<br>(N=672) | African American<br>Women<br>(N=220) | African American<br>Men<br>(N=154) | P-value† by race |        |         | P-value† by gender |          |         |
|-------------------------------------|------------------------|----------------------|--------------------------------------|------------------------------------|------------------|--------|---------|--------------------|----------|---------|
|                                     |                        |                      |                                      |                                    | Women            | Men    | Overall | Whites             | Afr. Am. | Overall |
| Hypertensive medication<br>use      | 55.1 %                 | 49.2 %               | 76.6 %                               | 60.4 %                             | <0.0001          | 0.0436 | <0.0001 | 0.0934             | 0.0054   | 0.0051  |
| Diabetes                            | 17.6 %                 | 21.7 %               | 31.2 %                               | 39.4 %                             | 0.0004           | 0.0003 | <0.0001 | 0.1351             | 0.1746   | 0.1302  |
| Diabetes medication use             | 10.6 %                 | 13.3 %               | 19.7 %                               | 28.9 %                             | 0.0044           | 0.0003 | <0.0001 | 0.2460             | 0.0890   | 0.1200  |
| Statin use                          | 31.8 %                 | 40.6 %               | 22.9 %                               | 27.5 %                             | 0.0369           | 0.0138 | 0.0053  | 0.0083             | 0.3945   | 0.0214  |
| Anti-inflammatory<br>medication use | 80.2 %                 | 80.2 %               | 73.6 %                               | 64.7 %                             | 0.0916           | 0.0013 | 0.0014  | 0.9868             | 0.1322   | 0.3219  |

\*Data presented as mean (standard error of the mean) or percentages.

†P-value for test of differences in means, and p-value by race and gender

‡P-value for test if there is no difference in current smoking and former smoking between groups
